# Supplementary material for: Production of Factor VIII by Human Liver Sinusoidal Endothelial Cells Transplanted in Immunodeficient uPA Mice
Source: PubMed Central journal article supplement (PMC3805584; doi:10.1371/journal.pone.0077255), 2013-10-22
Supplement: pone.0077255.s002.pdf [file pone.0077255.s002.pdf]

**Table S2. Quantitative polymerase chain reaction primer sequences used in the study.**

| Gene                               | Primers                                               | Position               | GenBank accession no. | Product size (bp) | References |
|------------------------------------|-------------------------------------------------------|------------------------|-----------------------|-------------------|------------|
| 18S rRNA (F)<br>18S rRNA (R)       | 5'- TTCGGAAGCTGAGGCCATGAT<br>5'- CGAACCTCCGACTTTCGTTT | 1842–1861<br>1992–1973 | gi22760900            | 151               | [1]        |
| CD31 (F)<br>CD31 (R)               | 5'- CCTGATGCCGTGGAAAGC<br>5'- TCCAGGGATGTGCATCTGG     | 2374–2391<br>2458–2440 | gi110347450           | 85                | [2]        |
| CD144 (F)<br>CD144 (R)             | 5'- GCCATCGATAATTCTGGACG<br>5'- CTTCCACCACGATCTCATA   | 662-681<br>746-722     | gi109734344           | 85                | [2]        |
| CD202b (F)<br>CD202b (R)           | 5'- GAGGAGCGAAAGACCTACG<br>5'- GCAGAACAGTCAATTCCTGC   | 3592-3610<br>3662-3643 | gi88758595            | 70                | [2]        |
| CD309 (F)<br>CD309 (R)             | 5'- CAGACGGACAGTGGTATGG<br>5'- AGTGATATCCGGACTGGTAG   | 3831-3849<br>3993-3974 | gi124297527           | 165               | [2]        |
| Factor VIII (F)<br>Factor VIII (R) | 5'- GGCTTCCCATCCTGTCAGTC<br>5'- GGGTCAGAGGCCATTGGACC  | 501-520<br>680-661     | gi192448441           | 180               |            |
| vWF (F)<br>vWF (R)                 | 5'- AGGAAGACCACCTGCAACC<br>5'- GCCGTAGGCAAACATCTCC    | 8106-8126<br>8194-8175 | gi89191867            | 89                | [2]        |

F, forward; R, reverse.

### Supplementary References

1. Lie-A-Ling M, CT Bakker, T Deurholt, et al. (2006). Selection of tumour specific promoters for adenoviral gene therapy of cholangiocarcinoma. *J Hepatol* 44:126–133.
2. Timmermans F, F Van Hauwermeiren, M De Smedt, et al. (2007). Endothelial outgrowth cells are not derived from CD133<sup>+</sup> cells or CD45<sup>+</sup> hematopoietic precursors. *Arterioscler Thromb Vasc Biol* 27:1572–1579.
